# Supplementary material for: Validating a breast cancer score in Spanish women. The MCC-Spain study
Source: PubMed Central journal article supplement (PMC5813036; doi:10.1038/s41598-018-20832-0), 2018-02-14

## TITLE PAGE

### Validating a breast cancer score in Spanish women. The MCC-Spain study.

**Authors:** Trinidad Dierssen-Sotos<sup>1,2</sup>, Inés Gómez-Acebo<sup>1,2</sup>, Camilo Palazuelos<sup>2</sup>, Pablo Fernández-Navarro<sup>1,3,4</sup>, Jone M Altzibar<sup>1,5</sup>, Carmen González-Donquiles<sup>1,6</sup>, Eva Ardanaz<sup>1,7,8</sup>, Mariona Bustamante<sup>1,9,10,11</sup>, Jessica Alonso-Molero<sup>2</sup>, Carmen Vidal<sup>12</sup>, Juan Bayo-Calero<sup>13</sup>, Adonina Tardón<sup>1,14</sup>, Dolores Salas<sup>15,16</sup>, Rafael Marcos-Gragera<sup>17</sup>, Víctor Moreno<sup>1,12,18</sup>, Paz Rodríguez-Cundin<sup>19</sup>, Gemma Castaño-Vinyals<sup>1,9,11,20</sup>, María Ederra<sup>1,7,8</sup>, Laura Vilorio-Marqués<sup>6</sup>, Pilar Amiano<sup>1,21</sup>, Beatriz Pérez-Gómez<sup>1,3,4</sup>, Nuria Aragonés<sup>1,3,4</sup>, Manolis Kogevinas<sup>1,9,11,20,22</sup>, Marina Pollán<sup>1,3,4</sup>, Javier Llorca<sup>1,2</sup>

#### Affiliations:

- 1: CIBER Epidemiología y Salud Pública (CIBERESP), Spain.
- 2: University of Cantabria – IDIVAL, Santander, Spain.
- 3: Cancer and Environmental Epidemiology Unit, National Center for Epidemiology, Carlos III Institute of Health. Madrid, Spain.
- 4: Cancer Epidemiology Research Group, Oncology and Hematology Area, IIS Puerta de Hierro (IDIPHIM), Madrid, Spain
- 5: Breast Cancer Screening Programme, Osakidetza, Basque Health Department, Spain.
- 6: Grupo de Investigación Interacciones Gen-Ambiente y Salud. Universidad de León, León, Spain.
- 7: Navarra Public Health Institute, Navarra, Spain.
- 8: IdiSNA, Navarra Institute for Health Research, Pamplona, Spain.
- 9: ISGlobal Centre for Research in Environmental Epidemiology (CREAL), Barcelona, Spain
10. Centre for Genomic Regulation (CRG), the Barcelona Institute of Science and Technology, Barcelona, Spain.
11. Universitat Pompeu Fabra (UPF), Barcelona, Spain.
- 12: Cancer Prevention and Control Program, Catalan Institute of Oncology-IDIBELL, L'Hospitalet de Llobregat, Spain.
- 13: Complejo Hospitalario Universitario de Huelva, Centro de Investigación en Salud y Medio Ambiente (CYSMA), Universidad de Huelva, Huelva, Spain.
- 14: IUOPA, Universidad de Oviedo, Asturias, Spain.
- 15: Valencia Cancer and Public Health Area, FISABIO – Public Health, Valencia, Spain.
- 16: General Directorate Public Health, Valencian Community. Spain.
- 17: Epidemiology Unit and Girona Cancer Registry, Oncology Coordination Plan, Department of Health, Autonomous Government of Catalonia and Descriptive Epidemiology, Genetics and Cancer Prevention Group [Girona Biomedical Research Institute (IdIBGi)], Catalan Institute of Oncology, Girona, Spain.
- 18: Department of Clinical Sciences, Faculty of Medicine, University of Barcelona, Barcelona, Spain.
- 19: University Hospital Marques de Valdecilla – IDIVAL, Santander, Spain.
- 20: IMIM (Hospital Del Mar Medical Research Institute), Barcelona, Spain.
- 21: Public Health Division of Gipuzkoa, BioDonostia Research Institute, San Sebastian, Spain.
- 22: School of Public Health, Athens, Greece.

Supplementary Table 1. List of SNPs included in the genetic risk score

a) GRS24: Genetic Risk Score with 24 SNPs

| SNP        | Gene                        | Chromosome | Location  | Major allele | Minor allele | Per allele odds ratio | Reference for odds ratio |
|------------|-----------------------------|------------|-----------|--------------|--------------|-----------------------|--------------------------|
| rs11249433 | EMBP1                       | 1          | 121538815 | T            | G            | 1.14                  | 13                       |
| rs1045485  | CASP8                       | 2          | 201284866 | G*           | C            | 1.04                  | 13                       |
| rs13387042 | LOC101928278 - LOC105373874 | 2          | 217041109 | G*           | A            | 1.27                  | 13                       |
| rs4973768  | SLC4A7                      | 3          | 27374522  | C            | T            | 1.07                  | 13                       |
| rs10069690 | TERT                        | 5          | 1279675   | C            | T            | 1.08                  | 13                       |
| rs10941679 | LOC102723839 - RN7SL383P    | 5          | 44706396  | A            | G            | 1.13                  | 13                       |
| rs889312   | LOC101928448 - LOC105378979 | 5          | 56736057  | A            | C            | 1.09                  | 13                       |
| rs17530068 | LOC105377871                | 6          | 81483392  | T            | C            | 1.06                  | 13                       |
| rs2046210  | CCDC170 - ESR1              | 6          | 151627231 | C            | A            | 1.05                  | 13                       |
| rs1562430  | CASC21 - CASC8              | 8          | 127375606 | A*           | C            | 1.11                  | 13                       |
| rs1011970  | CDKN2B-AS1                  | 9          | 22062135  | G            | T            | 1.06                  | 13                       |
| rs865686   | LOC105376214                | 9          | 108126198 | A/T*         | G            | 1.09                  | 13                       |
| rs2380205  | GDI2 - TRV-TAC3-1           | 10         | 5844771   | C*           | T            | 1.06                  | 13                       |
| rs10995190 | ZNF365                      | 10         | 62518923  | G*           | A            | 1.12                  | 13                       |
| rs1250003  | ZMIZ1                       | 10         | 79087057  | A            | C            | 1.07                  | 13                       |
| rs2981582  | FGFR2                       | 10         | 121592803 | C            | A            | 1.18                  | 13                       |
| rs909116   | TNNT3                       | 11         | 1920716   | T*           | C            | 1.05                  | 13                       |
| rs614367   | LINC01488 - CCND1           | 11         | 69513996  | C            | T            | 1.13                  | 13                       |
| rs10483813 | RAD51B                      | 14         | 68564567  | T*           | A            | 1.08                  | 13                       |
| rs999737   | RAD51B                      | 14         | 68567965  | C*           | T            | 1.08                  | 13                       |
| rs3803662  | CASC16                      | 16         | 52552429  | C            | A            | 1.21                  | 13                       |
| rs6504950  | STXBP4                      | 17         | 54979110  | G*           | A            | 1.08                  | 13                       |
| rs8170     | BABAM1                      | 19         | 17278895  | C*           | A            | 1.06                  | 13                       |
| rs2284378  | RALY                        | 20         | 34000289  | C*           | T            | 1.04                  | 13                       |

GRS68: Genetic Risk Score with 68 SNPs

| SNP        | Gene                     | Chromosome | Location  | Major allele | Minor allele | Per allele odds ratio | Reference for odds ratio |
|------------|--------------------------|------------|-----------|--------------|--------------|-----------------------|--------------------------|
| rs11552449 | AP4B1 - DCLRE1B          | 1          | 113905767 | C/G          | T            | 1.08                  | 17                       |
| rs12048493 | OTUD7B                   | 1          | 149955122 | A            | C            | 1.06                  | 18                       |
| rs12405132 | RNF115                   | 1          | 145790097 | C            | T            | 1.04                  | 18                       |
| rs4245739  | MDM4                     | 1          | 204549714 | A            | C            | 1.02                  | 17                       |
| rs616488   | PEX14                    | 1          | 10506158  | T            | G            | 1.05                  | 17                       |
| rs6678914  | LGR6                     | 1          | 202218048 | G            | A            | 1.01                  | 17                       |
| rs72755295 | EXO1                     | 1          | 241870961 | A            | G            | 1.15                  | 18                       |
| rs12710696 | LOC105373455 - MIR4757   | 2          | 19121042  | C            | T            | 1.03                  | 17                       |
| rs1550623  | LOC100289479 - CDCA7     | 2          | 173348166 | T*           | G            | 1.08                  | 17                       |
| rs16857609 | DIRC3                    | 2          | 217431785 | C            | T            | 1.06                  | 17                       |
| rs2016394  | DLX2-AS1                 | 2          | 172108243 | C*           | A            | 1.05                  | 17                       |
| rs4849887  | LINC01101 - LOC105373585 | 2          | 120487546 | C*           | T            | 1.09                  | 17                       |
| rs12493607 | TGFBR2                   | 3          | 30641447  | G/T          | C            | 1.07                  | 17                       |
| rs6762644  | ITPR1                    | 3          | 4700592   | A            | G            | 1.07                  | 17                       |
| rs6796502  |                          | 3          | 46825376  | G            | A            | 1.08                  | 18                       |
| rs6828523  | ADAM29                   | 4          | 174925275 | C*           | A            | 1.12                  | 17                       |
| rs9790517  | TET2                     | 4          | 105163621 | C            | T            | 1.03                  | 17                       |
| rs10472076 | RAB3C - PDE4D            | 5          | 58888234  | A/T          | C            | 1.05                  | 17                       |
| rs13162653 | LOC401176                | 5          | 16187419  | A/G          | T            | 1.03                  | 18                       |
| rs1353747  | PDE4D                    | 5          | 59041654  | T*           | C            | 1.1                   | 17                       |
| rs1432679  | EBF1                     | 5          | 158817075 | C            | T            | 1.07                  | 17                       |
| rs2012709  | SUB1                     | 5          | 32567626  | C            | T            | 1.05                  | 18                       |
| rs2736108  | TERT                     | 5          | 1297373   | G*           | T            | 1.06                  | 17                       |
| rs7707921  | ATG10                    | 5          | 82242227  | A            | T            | 1.09                  | 18                       |
| rs11242675 | FOXQ1 - LINC01394        | 6          | 1318643   | T*           | C            | 1.05                  | 17                       |

|            |                             |    |           |     |   |      |    |
|------------|-----------------------------|----|-----------|-----|---|------|----|
| rs12662670 | CCDC170                     | 6  | 151597721 | C/T | G | 1.22 | 17 |
| rs204247   | RANBP9 - MCUR1              | 6  | 13722291  | A   | G | 1.05 | 17 |
| rs9257408  |                             | 6  | 28958443  | C   | G | 1.05 | 18 |
| rs4593472  | LINC-PINT                   | 7  | 130982362 | C   | T | 1.05 | 18 |
| rs720475   | ARHGEF5                     | 7  | 144377836 | G*  | A | 1.08 | 17 |
| rs11780156 | MIR1208 - RN7SKP226         | 8  | 128182395 | C   | T | 1.1  | 17 |
| rs13267382 | LINC00536                   | 8  | 116197325 | A   | G | 1.06 | 18 |
| rs13365225 | RPL26P25 - LOC105379377     | 8  | 37000965  | A   | G | 1.06 | 18 |
| rs2943559  | HNF4G                       | 8  | 75505702  | A   | G | 1.13 | 17 |
| rs6472903  | HIGD1AP6 - PKMP4            | 8  | 75318066  | T*  | G | 1.12 | 17 |
| rs9693444  | RPL17P33 - LINC00589        | 8  | 29652100  | C   | A | 1.05 | 17 |
| rs10759243 | LOC105376206 - LOC105376205 | 9  | 107543834 | C/T | A | 1.06 | 17 |
| rs11199914 | LOC105378523 - RN7SKP167    | 10 | 121334387 | C*  | T | 1.04 | 17 |
| rs11814448 | DNAJC1 - ADIPOR1P1          | 10 | 22026914  | A   | C | 1.19 | 17 |
| rs7072776  | LOC107984214 - MLLT10       | 10 | 21744013  | G   | A | 1.06 | 17 |
| rs7904519  | TCF7L2                      | 10 | 113014168 | A   | G | 1.06 | 17 |
| rs11820646 | RPS27P20 - LINC01395        | 11 | 129591276 | C*  | T | 1.05 | 17 |
| rs554219   |                             | 11 | 69516874  |     |   | 1.27 | 17 |
| rs75915166 |                             | 11 | 69564393  | C   | A | 1.29 | 17 |
| rs10771399 | PTHLH - LOC105369710        | 12 | 28002147  | A*  | G | 1.18 | 18 |
| rs12422552 | GNAI2P1 - RPL30P11          | 12 | 14260997  | G   | C | 1.05 | 17 |
| rs1292011  | LOC105370003                | 12 | 115398717 | T*  | G | 1.08 | 17 |
| rs17356907 | USP44 - PGAM1P5             | 12 | 95633983  | A*  | G | 1.09 | 17 |
| rs11571833 | BRCA2                       | 13 | 32398489  | A   | T | 1.25 | 17 |
| rs11627032 | RIN3                        | 14 | 92637727  | T   | C | 1.04 | 18 |
| rs2236007  | LOC105370455 - PAX9         | 14 | 36663564  | G*  | A | 1.09 | 17 |
| rs2588809  | RAD51B                      | 14 | 68193711  | C   | T | 1.09 | 17 |
| rs941764   | CCDC88C                     | 14 | 91374725  | A   | G | 1.06 | 17 |
| rs11075995 | FTO                         | 16 | 53821379  | T   | A | 1.04 | 17 |

|                  |                             |    |          |     |   |      |    |
|------------------|-----------------------------|----|----------|-----|---|------|----|
| rs13329835       | CDYL2                       | 16 | 80616908 | A   | G | 1.09 | 17 |
| rs17817449       | FTO                         | 16 | 53779455 | T*  | G | 1.06 | 17 |
| chr17:29230520:D | ATAD5                       | 17 | 29230520 | GGT | G | 1.08 | 18 |
| rs745570         | CBX8 - LOC102723961         | 17 | 79807926 | C   | A | 1.04 | 18 |
| rs1436904        | CHST9                       | 18 | 26990703 | T*  | G | 1.04 | 17 |
| rs527616         | PCAT18 - LOC105372035       | 18 | 26757460 | G*  | C | 1.05 | 17 |
| rs6507583        | SETBP1                      | 18 | 44819625 | A   | G | 1.1  | 18 |
| rs2363956        | ANKLE1                      | 19 | 17283315 | T   | G | 1.02 | 17 |
| rs3760982        | KCNN4                       | 19 | 43782361 | G   | A | 1.06 | 17 |
| rs4808801        | ELL                         | 19 | 18460331 | A*  | G | 1.09 | 17 |
| rs2823093        | LOC107985483 - LOC105372739 | 21 | 15148511 | G*  | A | 1.06 | 17 |
| rs132390         | EMID - LOC105372985         | 22 | 29225488 | T   | C | 1.14 | 17 |
| rs17879961       | CHEK2                       | 22 | 28725099 | C/T | G | 1.07 | 17 |
| rs6001930        | MKL1                        | 22 | 40480230 | T   | C | 1.14 | 17 |

Minor allele = risk allele unless major allele is marked with an asterisk

Supplementary Table 2. Linkage disequilibrium between the SNPs indicated in Supplementary Table 1 (Source: <https://analysistools.nci.nih.gov/LDlink/?tab=home>; accessed: 8 January, 2018)

| Chromosome | SNP        | rs72755295 | rs4245739  | rs6678914 | rs12048493 | rs12405132 | rs11249433 | rs11552449 |            |           |
|------------|------------|------------|------------|-----------|------------|------------|------------|------------|------------|-----------|
| 1          | rs616488   | 0.0024     | 0.0003     | 0         | 0.0003     | 0.0011     | 0.0008     | 0.0006     |            |           |
|            | rs11552449 | 0.0019     | 0          | 0.0005    | 0.003      | 0.0005     | 0          |            |            |           |
|            | rs11249433 | 0.0032     | 0.0002     | 0.0003    | 0.0008     | 0.0012     |            |            |            |           |
|            | rs12405132 | 0.0001     | 0.0007     | 0.0028    | 0          |            |            |            |            |           |
|            | rs12048493 | 0.0022     | 0.0008     | 0.0059    |            |            |            |            |            |           |
|            | rs6678914  | 0.0003     | 0.3417     |           |            |            |            |            |            |           |
|            | rs4245739  | 0.0006     |            |           |            |            |            |            |            |           |
| 2          | SNP        | rs16857609 | rs13387042 | rs1045485 | rs1550623  | rs2016394  | rs4849887  |            |            |           |
|            | rs12710696 | 0.0001     | 0.0002     | 0.0002    | 0.0018     | 0.0004     | 0.0041     |            |            |           |
|            | rs4849887  | 0.0004     | 0.0001     | 0         | 0          | 0.001      |            |            |            |           |
|            | rs2016394  | 0          | 0.0005     | 0.0021    | 0.0047     |            |            |            |            |           |
|            | rs1550623  | 0.0001     | 0.0044     | 0.0009    |            |            |            |            |            |           |
|            | rs1045485  | 0          | 0          |           |            |            |            |            |            |           |
|            | rs13387042 | 0.0008     |            |           |            |            |            |            |            |           |
| 3          | SNP        | rs6796502  | rs12493607 | rs4973768 |            |            |            |            |            |           |
|            | rs6762644  | 0.002      | 0          | 0.0012    |            |            |            |            |            |           |
|            | rs4973768  | 0.0011     | 0.0003     |           |            |            |            |            |            |           |
|            | rs12493607 | 0.0006     |            |           |            |            |            |            |            |           |
| 4          | SNP        | rs6828523  |            |           |            |            |            |            |            |           |
|            | rs9790517  | 0.0016     |            |           |            |            |            |            |            |           |
| 5          | SNP        | rs1432679  | rs7707921  | rs1353747 | rs10472076 | rs889312   | rs10941679 | rs2012709  | rs13162653 | rs2736108 |
|            | rs10069690 | 0.0001     | 0.0004     | 0.0011    | 0.0004     | 0.0001     | 0.0004     | 0.0001     | 0.0003     | 0.0191    |
|            | rs2736108  | 0          | 0          | 0.0001    | 0.0031     | 0.0001     | 0.0004     | 0.0021     | 0          |           |
|            | rs13162653 | 0.0005     | 0.0002     | 0.0006    | 0.0004     | 0.0011     | 0.0001     | 0.0005     |            |           |

|           |            |                   |                   |                   |                  |                   |                   |                  |
|-----------|------------|-------------------|-------------------|-------------------|------------------|-------------------|-------------------|------------------|
|           | rs2012709  | 0                 | 0.0001            | 0.0002            | 0.0001           | 0.001             | 0.0025            |                  |
|           | rs10941679 | 0.0003            | 0.0002            | 0.0014            | 0.0025           | 0.0001            |                   |                  |
|           | rs889312   | 0.0002            | 0.0007            | 0                 | 0.0001           |                   |                   |                  |
|           | rs10472076 | 0.0001            | 0.0009            | 0.0312            |                  |                   |                   |                  |
|           | rs1353747  | 0.0006            | 0.0014            |                   |                  |                   |                   |                  |
|           | rs7707921  | 0.0003            |                   |                   |                  |                   |                   |                  |
| <b>6</b>  | <b>SNP</b> | <b>rs2046210</b>  | <b>rs12662670</b> | <b>rs17530068</b> | <b>rs9257408</b> | <b>rs204247</b>   |                   |                  |
|           | rs11242675 | 0.0015            | 0.0001            | 0.002             | 0                | 0.003             |                   |                  |
|           | rs204247   | 0.0013            | 0.0018            | 0.0036            | 0.0011           |                   |                   |                  |
|           | rs9257408  | 0.0007            | 0.0007            | 0.0011            |                  |                   |                   |                  |
|           | rs17530068 | 0.0002            | 0.0007            |                   |                  |                   |                   |                  |
|           | rs12662670 | 0.1352            |                   |                   |                  |                   |                   |                  |
| <b>7</b>  | <b>SNP</b> | <b>rs720475</b>   |                   |                   |                  |                   |                   |                  |
|           | rs4593472  | 0.0015            |                   |                   |                  |                   |                   |                  |
| <b>8</b>  | <b>SNP</b> | <b>rs11780156</b> | <b>rs1562430</b>  | <b>rs13267382</b> | <b>rs2943559</b> | <b>rs6472903</b>  | <b>rs13365225</b> |                  |
|           | rs9693444  | 0.0001            | 0.0005            | 0.0006            | 0.001            | 0.0001            | 0.0002            |                  |
|           | rs13365225 | 0.0005            | 0.0012            | 0.0009            | 0.0003           | 0                 |                   |                  |
|           | rs6472903  | 0.0004            | 0.003             | 0.0018            | 0.0005           |                   |                   |                  |
|           | rs2943559  | 0.006             | 0.0009            | 0.0001            |                  |                   |                   |                  |
|           | rs13267382 | 0                 | 0                 |                   |                  |                   |                   |                  |
|           | rs1562430  | 0.0005            |                   |                   |                  |                   |                   |                  |
| <b>9</b>  | <b>SNP</b> | <b>rs865686</b>   | <b>rs10759243</b> |                   |                  |                   |                   |                  |
|           | rs1011970  | 0                 | 0.0001            |                   |                  |                   |                   |                  |
|           | rs10759243 | 0.0043            |                   |                   |                  |                   |                   |                  |
| <b>10</b> | <b>SNP</b> | <b>rs2981582</b>  | <b>rs11199914</b> | <b>rs7904519</b>  | <b>rs1250003</b> | <b>rs10995190</b> | <b>rs11814448</b> | <b>rs7072776</b> |
|           | rs2380205  | 0.0003            | 0.0002            | 0.0008            | 0.0001           | 0.0007            | 0.0002            | 0                |
|           | rs7072776  | 0.0024            | 0.0002            | 0                 | 0.0001           | 0                 | 0.0454            |                  |
|           | rs11814448 | 0.0014            | 0                 | 0.0034            | 0.0005           | 0.0013            |                   |                  |

|           |                  |                   |                   |                   |                   |                  |
|-----------|------------------|-------------------|-------------------|-------------------|-------------------|------------------|
|           | rs10995190       | 0                 | 0.0003            | 0.0007            | 0.0001            |                  |
|           | rs1250003        | 0.0027            | 0.0012            | 0.0007            |                   |                  |
|           | rs7904519        | 0.0038            | 0.0007            |                   |                   |                  |
|           | rs11199914       | 0.0006            |                   |                   |                   |                  |
| <b>11</b> | <b>SNP</b>       | <b>rs11820646</b> | <b>rs75915166</b> | <b>rs554219</b>   | <b>rs614367</b>   |                  |
|           | rs909116         | 0.0006            | 0                 | NA                | NA                |                  |
|           | rs614367         | NA                | NA                | NA                |                   |                  |
|           | rs554219         | NA                | NA                |                   |                   |                  |
|           | rs75915166       | 0                 |                   |                   |                   |                  |
| <b>12</b> | <b>SNP</b>       | <b>rs1292011</b>  | <b>rs17356907</b> | <b>rs10771399</b> |                   |                  |
|           | rs12422552       | 0                 | 0.0026            | 0.0001            |                   |                  |
|           | rs10771399       | 0.001             | 0.0015            |                   |                   |                  |
|           | rs17356907       | 0.0013            |                   |                   |                   |                  |
| <b>14</b> | <b>SNP</b>       | <b>rs11627032</b> | <b>rs941764</b>   | <b>rs999737</b>   | <b>rs10483813</b> | <b>rs2588809</b> |
|           | rs2236007        | 0.0018            | 0.0005            | 0.0001            | 0.0003            | 0.0009           |
|           | rs2588809        | 0                 | 0.0009            | 0.0044            | 0.0038            |                  |
|           | rs10483813       | 0.0003            | 0.0006            | 0.9821            |                   |                  |
|           | rs999737         | 0.0003            | 0.0008            |                   |                   |                  |
|           | rs941764         | 0.0001            |                   |                   |                   |                  |
| <b>16</b> | <b>SNP</b>       | <b>rs13329835</b> | <b>rs11075995</b> | <b>rs17817449</b> |                   |                  |
|           | rs3803662        | 0.0014            | 0.002             | 0.0001            |                   |                  |
|           | rs17817449       | 0.0005            | 0.0158            |                   |                   |                  |
|           | rs11075995       | 0                 |                   |                   |                   |                  |
| <b>17</b> | <b>SNP</b>       | <b>rs745570</b>   | <b>rs6504950</b>  |                   |                   |                  |
|           | chr17:29230520:D | NA                | NA                |                   |                   |                  |
|           | rs6504950        | 0.0001            |                   |                   |                   |                  |
| <b>18</b> | <b>SNP</b>       | <b>rs6507583</b>  | <b>rs1436904</b>  |                   |                   |                  |
|           | rs527616         | 0.0021            | 0.0001            |                   |                   |                  |



|           |                   |                  |                  |                  |
|-----------|-------------------|------------------|------------------|------------------|
|           | <b>rs1436904</b>  | 0.002            |                  |                  |
| <b>19</b> | <b>SNP</b>        | <b>rs3760982</b> | <b>rs4808801</b> | <b>rs2363956</b> |
|           | <b>rs8170</b>     | 0.0003           | 0.0001           | 0.2609           |
|           | <b>rs2363956</b>  | 0                | 0.0007           |                  |
|           | <b>rs4808801</b>  | 0.0036           |                  |                  |
| <b>22</b> | <b>SNP</b>        | <b>rs6001930</b> | <b>rs132390</b>  |                  |
|           | <b>rs17879961</b> | 0.0005           | 0.0001           |                  |
|           | <b>rs132390</b>   | 0.0001           |                  |                  |

Supplementary Table 3. Categories used in continuous variables (cut points proceed from Maas et al (2016))

| Variable           | Units             | Category <sup>a</sup>   |                            |               |               |               |               |               |               |               |       |
|--------------------|-------------------|-------------------------|----------------------------|---------------|---------------|---------------|---------------|---------------|---------------|---------------|-------|
|                    |                   | 1                       | 2                          | 3             | 4             | 5             | 6             | 7             | 8             | 9             | 10    |
| Age at menarche    | Years             | ≤11                     | 11.0-<br>11.5 <sup>b</sup> | 11.5-<br>12.0 | 12.0-<br>13.0 | 13.0-<br>14.0 | 14.0-<br>15.0 | >15.0         |               |               |       |
| Age at first birth | Years             | ≤19 or no children      | 19-22                      | 22-23         | 23-25         | 25-27         | 27-30         | 30-34         | 34-38         | >38           |       |
| Age at menopause   | Years             | ≤40 or<br>premenopausal | 40-45                      | 45-47         | 47-48         | 48-50         | 50-51         | 51-52         | 52-53         | 53-55         | >55   |
| Alcohol use        | Drinks/week       | 0.0                     | 0.0-0.4                    | 0.4-0.8       | 0.8-1.5       | 1.5-3.2       | 3.2-5.7       | 5.7-9.8       | >9.8          |               |       |
| Body mass index    | kg/m <sup>2</sup> | ≤21.5                   | 21.5-<br>23.0              | 23.0-<br>24.2 | 24.2-<br>25.3 | 25.3-<br>26.5 | 26.5-<br>27.8 | 27.8-<br>29.3 | 29.3-<br>31.4 | 31.4-<br>34.6 | >34.6 |
| Height             | Meters            | ≤1.55                   | 1.55-<br>1.57              | 1.57-<br>1.60 | 1.60-<br>1.61 | 1.61-<br>1.63 | 1.63-<br>1.65 | 1.65-<br>1.66 | 1.66-<br>1.68 | 1.68-<br>1.71 | >1.71 |

<sup>a</sup> Each category includes right end point but not left end point.

<sup>b</sup> Age at menarche was recorded in accomplished years, so category 2 was empty.

Supplementary Table 4. Sample description according to modifiable and non-modifiable risk factors. Odds ratios (OR) and 95% confidence intervals (CI) are adjusted by age and the remaining factors in the table.

| Variable                                 | Category                          | Breast cancer |           | OR (95% CI)     |
|------------------------------------------|-----------------------------------|---------------|-----------|-----------------|
|                                          |                                   | cases         | Controls  |                 |
| <b>Age (years mean±sd)</b>               |                                   | 56.4±12.6     | 59.0±13.2 | 0.98(0.97-0.99) |
| <b>Height (m)</b>                        | ≤1.55                             | 402           | 447       | 1(Ref)          |
|                                          | 1.55-1.57                         | 212           | 241       | 0.97(0.75-1.25) |
|                                          | 1.57-1.60                         | 379           | 447       | 0.89(0.71-1.10) |
|                                          | 1.60-1.61                         | 53            | 50        | 1.05(0.65-1.70) |
|                                          | 1.61-1.63                         | 191           | 209       | 0.87(0.66-1.15) |
|                                          | 1.63-1.65                         | 193           | 213       | 0.86(0.66-1.13) |
|                                          | 1.65-1.66                         | 34            | 34        | 0.98(0.57-1.69) |
|                                          | 1.66-1.68                         | 124           | 110       | 1.00(0.72-1.40) |
|                                          | 1.68-1.71                         | 78            | 92        | 0.77(0.52-1.12) |
|                                          | >1.71                             | 66            | 61        | 1.13(0.74-1.75) |
| <b>BMI (kg/m<sup>2</sup>)</b>            | ≤21.5                             | 276           | 319       | 1(Ref)          |
|                                          | 21.5-23.0                         | 210           | 260       | 0.95(0.72-1.26) |
|                                          | 23.0-24.2                         | 198           | 223       | 1.16(0.87-1.55) |
|                                          | 24.2-25.3                         | 170           | 195       | 1.24(0.92-1.68) |
|                                          | 25.3-26.5                         | 176           | 175       | 1.49(1.10-2.03) |
|                                          | 26.5-27.8                         | 164           | 163       | 1.55(1.14-2.11) |
|                                          | 27.8-29.3                         | 155           | 150       | 1.77(1.29-2.43) |
|                                          | 29.3-31.4                         | 176           | 160       | 1.60(1.17-2.19) |
|                                          | 31.4-34.6                         | 119           | 140       | 1.36(0.97-1.90) |
|                                          | >34.6                             | 88            | 110       | 1.40(0.96-2.04) |
| <b>Alcohol consumption (drinks/week)</b> | 0                                 | 486           | 540       | 1(Ref)          |
|                                          | 0.0-0.4                           | 127           | 129       | 0.94(0.69-1.27) |
|                                          | 0.4-0.8                           | 132           | 134       | 1.03(0.76-1.40) |
|                                          | 0.8-1.5                           | 148           | 171       | 0.81(0.61-1.08) |
|                                          | 1.5-3.2                           | 304           | 342       | 0.89(0.71-1.12) |
|                                          | 3.2-5.7                           | 265           | 289       | 0.83(0.66-1.06) |
|                                          | 5.7-9.8                           | 134           | 166       | 0.82(0.62-1.10) |
|                                          | >9.8                              | 136           | 139       | 1.01(0.74-1.36) |
| <b>Family history of breast cancer</b>   | No first-degree relative affected | 1157          | 1509      | 1(Ref)          |
|                                          | First-degree relative affected    | 255           | 167       | 2.19(1.76-2.72) |
| <b>Age at menarche</b>                   | ≤11                               | 74            | 100       | 1(Ref)          |
|                                          | 11.0-11.5                         | 118           | 134       | 1.09(0.71-1.67) |
|                                          | 11.5-12.0                         | 333           | 408       | 1.05(0.73-1.52) |
|                                          | 12.0-13.0                         | 455           | 463       | 1.21(0.85-1.74) |
|                                          | 13.0-14.0                         | 425           | 460       | 1.17(0.81-1.69) |

|                                    |                             |      |      |                 |
|------------------------------------|-----------------------------|------|------|-----------------|
|                                    | <b>14.0-15.0</b>            | 246  | 262  | 1.19(0.81-1.75) |
|                                    | <b>&gt;15.0</b>             | 81   | 65   | 1.51(0.92-2.50) |
| <b>Parity</b>                      | <b>0</b>                    | 351  | 355  | 1(Ref)          |
|                                    | <b>1</b>                    | 319  | 294  | 1.19(0.78-1.82) |
|                                    | <b>2</b>                    | 674  | 751  | 0.97(0.66-1.45) |
|                                    | <b>3</b>                    | 250  | 293  | 0.99(0.66-1.49) |
|                                    | <b>≥4</b>                   | 130  | 206  | 0.79(0.51-1.21) |
| <b>Age at first delivery</b>       | <b>≤19 or no children</b>   | 441  | 448  | 1(Ref)          |
|                                    | <b>19-22</b>                | 201  | 217  | 1.05(0.70-1.56) |
|                                    | <b>22-23</b>                | 96   | 111  | 0.90(0.57-1.43) |
|                                    | <b>23-25</b>                | 228  | 286  | 0.85(0.57-1.26) |
|                                    | <b>25-27</b>                | 228  | 265  | 0.86(0.58-1.28) |
|                                    | <b>27-30</b>                | 249  | 293  | 0.85(0.57-1.26) |
|                                    | <b>30-34</b>                | 182  | 186  | 0.89(0.58-1.35) |
|                                    | <b>34-38</b>                | 78   | 78   | 0.98(0.59-1.61) |
|                                    | <b>&gt;38</b>               | 29   | 26   | 1.15(0.57-2.32) |
| <b>Menopausal status</b>           | <b>Premenopause</b>         | 610  | 554  | 1.01(0.76-1.33) |
|                                    | <b>Postmenopause</b>        | 1122 | 1356 | 1(Ref)          |
| <b>Age at menopause</b>            | <b>≤40 or premenopausal</b> | 850  | 893  | 1(Ref)          |
|                                    | <b>40-45</b>                | 124  | 198  | 0.83(0.61-1.13) |
|                                    | <b>45-47</b>                | 94   | 84   | 1.58(1.08-2.30) |
|                                    | <b>47-48</b>                | 62   | 107  | 0.83(0.56-1.22) |
|                                    | <b>48-50</b>                | 189  | 243  | 1.10(0.83-1.47) |
|                                    | <b>50-51</b>                | 50   | 34   | 1.92(1.14-3.23) |
|                                    | <b>51-52</b>                | 116  | 126  | 1.32(0.94-1.85) |
|                                    | <b>52-53</b>                | 81   | 61   | 1.70(1.12-2.58) |
|                                    | <b>53-55</b>                | 112  | 113  | 1.35(0.95-1.92) |
|                                    | <b>&gt;55</b>               | 54   | 51   | 1.63(1.03-2.58) |
| <b>Hormone replacement therapy</b> | <b>Never</b>                | 1574 | 1692 | 1(Ref)          |
|                                    | <b>Ever</b>                 | 116  | 135  | 1.01(0.75-1.36) |
|                                    | <b>Not known</b>            | 38   | 68   | 0.77(0.50-1.19) |

Supplementary Table 5. Scores in breast cancer cases and controls, mean±standard deviation

| <b>Score</b>      | <b>Controls</b> | <b>Breast cancer cases</b> | <b>p</b> |
|-------------------|-----------------|----------------------------|----------|
| <b>GRS24</b>      | 1.78±0.29       | 1.85±0.29                  | <0.001   |
| <b>GRS68</b>      | 3.78±0.36       | 3.90±0.35                  | <0.001   |
| <b>GRS92</b>      | 5.56±0.46       | 5.75±0.45                  | <0.001   |
| <b>NMRFS</b>      | 0.29±0.45       | 0.44±0.48                  | <0.001   |
| <b>MRFS</b>       | 0.27±0.37       | 0.30±0.36                  | 0.009    |
| <b>RFS</b>        | 0.56±0.62       | 0.74±0.65                  | <0.001   |
| <b>Full model</b> | 6.05±0.76       | 6.41±0.78                  | <0.001   |

GRS24: Genetic Risk Score with 24 SNPs

GRS68: Genetic Risk Score with 68 SNPs

GRS92: Genetic Risk Score with 92 SNPs

NMRFS: Non-modifiable Risk Factor Score

MRFS: Modifiable Risk Factor Score

RFS: Risk Factor Score

Supplementary Table 6. Pearson correlation coefficient among genetic scores, modifiable risk factor score, nonmodifiable risk factor score and full model

|                   | <b>GRS68</b> | <b>GRS24</b> | <b>GRS92</b> | <b>NMRFS</b> | <b>MRFS</b> | <b>RF</b> |
|-------------------|--------------|--------------|--------------|--------------|-------------|-----------|
| <b>GRS24</b>      | 0.01         |              |              |              |             |           |
| <b>GRS92</b>      | 0.78         | 0.64         |              |              |             |           |
| <b>NMRFS</b>      | 0.05         | 0.04         | 0.07         |              |             |           |
| <b>MRFS</b>       | <-0.01       | 0.01         | <0.01        | 0.22         |             |           |
| <b>RF</b>         | 0.04         | 0.03         | 0.05         | 0.82         | 0.74        |           |
| <b>Full model</b> | 0.49         | 0.40         | 0.63         | 0.58         | 0.58        | 0.81      |

GRS24: Genetic Risk Score with 24 SNPs  
 GRS68: Genetic Risk Score with 68 SNPs  
 GRS92: Genetic Risk Score with 92 SNPs  
 NMRFS: Non-modifiable Risk Factor Score  
 MRFS: Modifiable Risk Factor Score  
 RF: Risk Factor Score

Supplementary Table 7. Sensitivity analysis on imputation results: Relationship between breast cancer and GRS24 (in deciles) according on whether GRS24 was obtained by genotyping or by imputation: Odds ratios (OR) and 95% confidence intervals

| <b>GRS24 decile</b> | <b>OR in the whole sample</b> | <b>OR in 1138 cases and 1239 controls with available genotype</b> | <b>OR in 594 cases and 671 controls without available genotype</b> |
|---------------------|-------------------------------|-------------------------------------------------------------------|--------------------------------------------------------------------|
| <b>1</b>            | 1 (reference)                 | 1 (reference)                                                     | 1 (reference)                                                      |
| <b>2</b>            | 1.20 (0.89 – 1.63)            | 0.95 (0.66 – 1.37)                                                | 1.43 (0.83 – 2.47)                                                 |
| <b>3</b>            | 1.13 (0.83 – 1.53)            | 1.04 (0.72 – 1.49)                                                | 0.85 (0.49 – 1.49)                                                 |
| <b>4</b>            | 1.54 (1.14 – 2.08)            | 1.27 (0.88 – 1.83)                                                | 1.28 (0.74 – 2.21)                                                 |
| <b>5</b>            | 1.31 (0.96 – 1.77)            | 1.38 (0.96 – 1.99)                                                | 2.00 (1.16 – 3.43)                                                 |
| <b>6</b>            | 1.58 (1.17 – 2.14)            | 1.23 (0.85 – 1.77)                                                | 1.89 (1.10 – 3.24)                                                 |
| <b>7</b>            | 1.49 (1.10 – 2.01)            | 1.21 (0.84 – 1.74)                                                | 1.66 (0.97 – 2.86)                                                 |
| <b>8</b>            | 1.93 (1.42 – 2.61)            | 1.78 (1.24 – 2.57)                                                | 1.46 (0.85 – 2.51)                                                 |
| <b>9</b>            | 1.83 (1.35 – 2.48)            | 1.58 (1.10 – 2.28)                                                | 2.40 (1.39 – 4.14)                                                 |
| <b>10</b>           | 2.34 (1.73 – 3.17)            | 1.94 (1.35 – 2.80)                                                | 2.79 (1.62 – 4.83)                                                 |

**Supplementary fig. 1.** ROC curves of genetic and risk factor scores – breast cancer relationship.

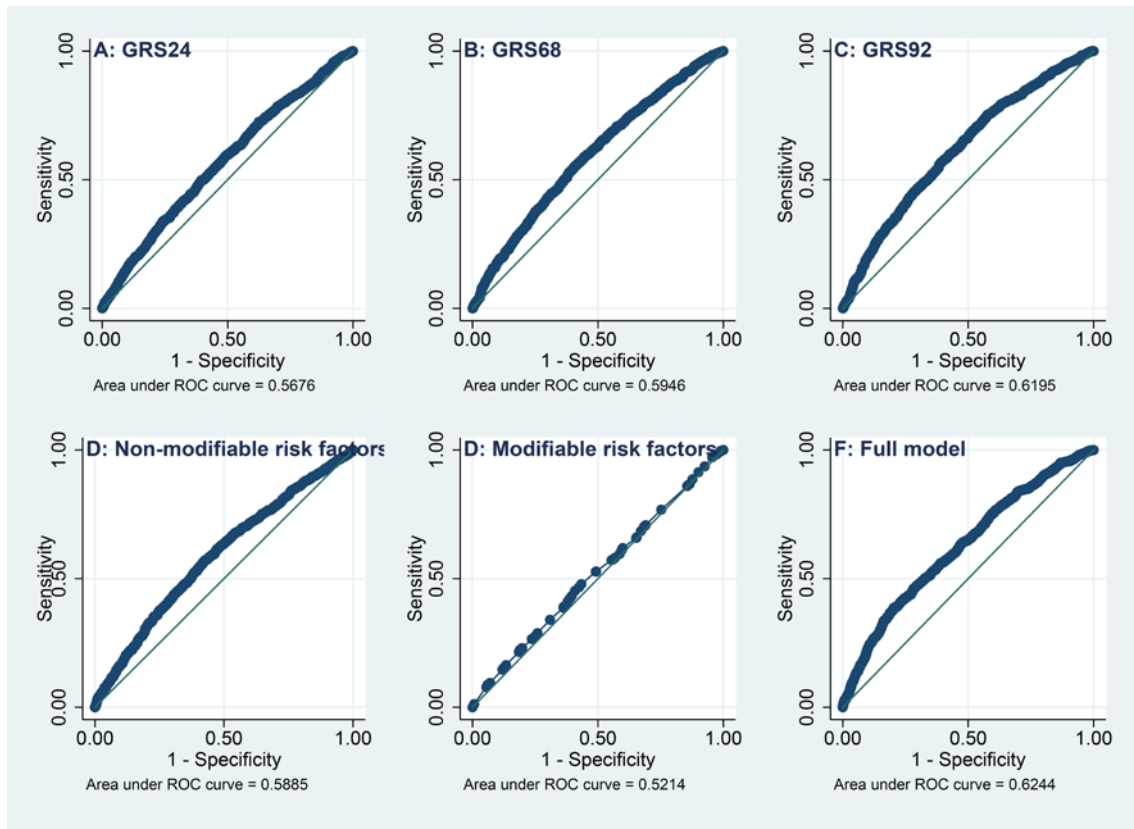

Supplement: 41598_2018_20832_MOESM1_ESM.pdf [file 41598_2018_20832_MOESM1_ESM.pdf]
